# Supplementary material for: Trends and Associations of Past-30-Day Cigar Smoking in the U.S. by Age, Race/Ethnicity, and Sex, NSDUH 2002–2020
Source: MDPI journal article supplement (doi:10.3390/ijerph20186716), 2023-09-06
Supplement: s1 [file s1]

| Supplementary Table S1. Variable categorization and construction |                                                                                                                                                                            |
|------------------------------------------------------------------|----------------------------------------------------------------------------------------------------------------------------------------------------------------------------|
| Variable                                                         | Definition                                                                                                                                                                 |
| <b>Cigar smoking<sup>a</sup></b>                                 |                                                                                                                                                                            |
| Past 30-day cigar smoking                                        | Smoking a cigar on $\geq 1$ day during the past 30 days (yes/no)                                                                                                           |
| Age at first cigar use <sup>b</sup>                              | The age at which respondents first smoked part or all of any type of cigar                                                                                                 |
| Frequency of cigar smoking <sup>b</sup>                          | The number of days during the past 30 days on which respondents smoked part or all of a cigar                                                                              |
| <b>Sociodemographic variables</b>                                |                                                                                                                                                                            |
| Sex                                                              | Male; female                                                                                                                                                               |
| Race/ethnicity                                                   | Non-Hispanic White; non-Hispanic Black; Hispanic non-Hispanic Other (i.e., Native American/Alaska Native, Native Hawaiian/Other Pacific Islander, Asian, more than 1 race) |
| Age                                                              | 12-17; 18-20; 21-25; 26-34; 35+<br>12-20; 21+, for a subset of analyses                                                                                                    |
| Income                                                           | <\$20,000; \$20,000-\$49,000; \$50,000-\$74,999; \$75,000+                                                                                                                 |
| Current school grade <sup>c</sup>                                | $\leq 8^{\text{th}}$ grade; $9^{\text{th}}$ - $12^{\text{th}}$ grade                                                                                                       |
| Educational attainment <sup>d</sup>                              | <High school diploma/GED; $\geq$ high school/GED                                                                                                                           |
| Sexual identity <sup>d</sup>                                     | Heterosexual; gay or lesbian; bisexual; don't know                                                                                                                         |
| <b>Other tobacco use variables</b>                               |                                                                                                                                                                            |
| Past 30-day cigarette smoking                                    | Smoking a cigarette on $\geq 1$ day during the past 30 days (yes/no)                                                                                                       |
| Menthol cigarette smoking <sup>e</sup>                           | Were cigarettes smoked during past 30 days menthol (yes/no)                                                                                                                |
| Past 30-day nicotine vaping                                      | Vaping nicotine or tobacco on $\geq 1$ day during the past 30 days (yes/no)                                                                                                |

|                                                                                                                                                                                                                                                                                                                                                                                                                                                                         |                                                                                                              |
|-------------------------------------------------------------------------------------------------------------------------------------------------------------------------------------------------------------------------------------------------------------------------------------------------------------------------------------------------------------------------------------------------------------------------------------------------------------------------|--------------------------------------------------------------------------------------------------------------|
| Past 30-day smokeless tobacco use                                                                                                                                                                                                                                                                                                                                                                                                                                       | Using smokeless tobacco products on $\geq 1$ day during the past 30 days (yes/no)                            |
| <b>Other covariates</b>                                                                                                                                                                                                                                                                                                                                                                                                                                                 |                                                                                                              |
| Health insurance coverage                                                                                                                                                                                                                                                                                                                                                                                                                                               | Has some form of health insurance (yes/no)                                                                   |
| Past-year illicit drug or alcohol abuse or dependence                                                                                                                                                                                                                                                                                                                                                                                                                   | Met criteria for past-year illicit drug or alcohol use disorder (yes/no)                                     |
| General overall health quality                                                                                                                                                                                                                                                                                                                                                                                                                                          | Good/very good/excellent; fair/poor                                                                          |
| Lifetime service in U.S. armed forces <sup>d</sup>                                                                                                                                                                                                                                                                                                                                                                                                                      | Yes/no                                                                                                       |
| Past-month serious psychological distress <sup>d</sup>                                                                                                                                                                                                                                                                                                                                                                                                                  | Scores >13 were categorized as being indicative of serious psychological distress in the past month (yes/no) |
| <sup>a</sup> The NSDUH questionnaire prefaces the items on cigar smoking with the following text: "By cigars we mean any kind, including big cigars, cigarillos, and even little cigars that look like cigarette"<br><sup>b</sup> Assessed among past 30-day cigar users only<br><sup>c</sup> Assessed among youth aged 12-17 years only<br><sup>d</sup> Assessed among adults aged 18 and older only<br><sup>e</sup> Assessed among past 30-day cigarette smokers only |                                                                                                              |

| Supplementary Table S2. Characteristics of past 30-day cigar smokers, by age group— National Survey on Drug Use and Health, United States, 2020 (n=1,169; Weighted n=10,383,560) |                    |                                            |                                             |                                                  |                                                  |                                                |                  |
|----------------------------------------------------------------------------------------------------------------------------------------------------------------------------------|--------------------|--------------------------------------------|---------------------------------------------|--------------------------------------------------|--------------------------------------------------|------------------------------------------------|------------------|
|                                                                                                                                                                                  |                    | Age                                        |                                             |                                                  |                                                  |                                                | $\chi^2$ p-value |
|                                                                                                                                                                                  |                    | Age 12-17<br>(n=57;<br>Weighted n=176,960) | Age 18-20<br>(n=123;<br>Weighted n=711,650) | Age 21-25<br>(n=300;<br>Weighted<br>n=1,285,100) | Age 26-34<br>(n=285;<br>Weighted<br>n=2,538,010) | Age 35+<br>(n=400;<br>Weighted<br>n=5,671,840) |                  |
|                                                                                                                                                                                  |                    | % (95% CI)                                 | % (95% CI)                                  | % (95% CI)                                       | % (95% CI)                                       | % (95% CI)                                     |                  |
| Past 30-day cigar smoking                                                                                                                                                        |                    | 0.71 (0.51-0.99)                           | 5.76 (4.20-7.85)                            | 6.08 (5.21-7.08)                                 | 6.26 (5.04-7.76)                                 | 3.19 (2.74-3.70)                               | <0.001           |
| Number of days smoked cigars in the past 30 days                                                                                                                                 | 1-5 days           | 66.99 (47.98-81.71)                        | 67.63 (50.62-80.98)                         | 56.71 (48.18-64.86)                              | 64.48 (53.11-74.42)                              | 54.08 (45.36-62.55)                            | 0.265            |
|                                                                                                                                                                                  | 6-19 days          | 21.18 (10.95-36.99)                        | 10.77 (5.38-20.40)                          | 21.00 (14.05-30.17)                              | 11.23 (6.92-17.72)                               | 15.16 (11.09-20.40)                            |                  |
|                                                                                                                                                                                  | 20+ days           | 11.83 (3.21-35.20)                         | 21.60 (10.57-39.11)                         | 22.29 (16.62-29.21)                              | 24.29 (15.69-35.61)                              | 30.76 (22.67-40.23)                            |                  |
| Age of cigar initiation Median (SE)                                                                                                                                              |                    | 14.06 (0.38)                               | 15.59 (0.59)                                | 16.91 (0.33)                                     | 17.77 (0.30)                                     | 22.18 (1.17)                                   |                  |
| Past 30-day cigarette smoking                                                                                                                                                    |                    | 39.11 (20.81-61.08)                        | 34.72 (20.95-51.62)                         | 55.41 (47.58-62.98)                              | 45.91 (37.13-54.96)                              | 47.69 (39.04-56.49)                            | 0.201            |
| Past 30-day menthol cigarette smoking <sup>a</sup>                                                                                                                               |                    | 66.28 (34.82-87.86)                        | 55.30 (30.63-77.62)                         | 52.41 (40.10-64.43)                              | 56.39 (43.60-68.38)                              | 53.14 (38.10-67.63)                            | 0.926            |
| Past 30-day nicotine e-cigarette use                                                                                                                                             |                    | 39.11 (23.99-56.66)                        | 25.07 (15.95-37.12)                         | 32.02 (23.34-42.16)                              | 8.15 (5.18-12.59)                                | 4.82 (2.69-8.49)                               | <0.001           |
| Past 30-day smokeless tobacco use                                                                                                                                                |                    | 8.74 (3.07-22.45)                          | 16.42 (5.97-37.82)                          | 8.03 (4.80-13.12)                                | 6.40 (4.08-9.89)                                 | 5.15 (2.78-9.34)                               | 0.535            |
| Sex                                                                                                                                                                              | Male               | 64.20 (20.74-54.31)                        | 72.82 (57.32-84.24)                         | 63.03 (56.04-69.51)                              | 71.10 (63.74-77.50)                              | 75.14 (68.86-80.52)                            | 0.168            |
|                                                                                                                                                                                  | Female             | 35.80 (20.74-54.31)                        | 27.18 (15.76-42.68)                         | 36.97 (30.49-43.96)                              | 28.90 (22.50-36.26)                              | 24.86 (19.48-31.14)                            |                  |
| Race/Ethnicity                                                                                                                                                                   | Non-Hispanic White | 71.06 (49.46-86.03)                        | 55.74 (39.27-71.04)                         | 60.59 (53.18-67.54)                              | 52.68 (43.91-61.29)                              | 60.42 (52.28-68.01)                            | 0.254            |
|                                                                                                                                                                                  | Non-Hispanic Black | 16.33 (5.75-38.43)                         | 30.44 (15.77-50.57)                         | 20.46 (13.94-29.00)                              | 28.07 (19.82-38.12)                              | 25.68 (19.06-33.64)                            |                  |
|                                                                                                                                                                                  | Hispanic           | 7.29 (2.10-22.34)                          | 6.27 (2.68-13.96)                           | 10.66 (6.37-17.32)                               | 14.37 (8.72-22.78)                               | 9.62 (5.86-15.39)                              |                  |
|                                                                                                                                                                                  | Non-Hispanic Other | 5.32 (1.97-13.57)                          | 7.55 (2.84-18.58)                           | 8.29 (4.80-13.93)                                | 4.88 (2.10-10.93)                                | 4.29 (2.30-7.86)                               |                  |
| Sexual identity <sup>b</sup>                                                                                                                                                     |                    | -                                          | 84.49 (74.83-90.89)                         | 76.53 (69.25-82.52)                              | 87.08 (80.27-91.77)                              | 94.98 (91.95-96.91)                            | <0.001           |

|                                                                                                                                                                                        |                                         |                     |                     |                     |                     |                     |        |
|----------------------------------------------------------------------------------------------------------------------------------------------------------------------------------------|-----------------------------------------|---------------------|---------------------|---------------------|---------------------|---------------------|--------|
|                                                                                                                                                                                        | Gay or Lesbian                          | -                   | 0.62 (0.09-4.39)    | 3.09 (0.95-9.55)    | 5.42 (2.54-11.17)   | 0.58 (0.15-2.15)    |        |
|                                                                                                                                                                                        | Bisexual                                | -                   | 14.89 (8.56-24.64)  | 19.55 (13.87-26.83) | 6.98 (3.65-12.96)   | 3.78 (2.16-6.54)    |        |
|                                                                                                                                                                                        | Don't know                              | -                   | 0.00                | 0.83 (0.11-6.19)    | 0.53 (0.13-2.14)    | 0.66 (0.16-2.72)    |        |
| <b>Completed education<sup>b</sup></b>                                                                                                                                                 | <HS diploma/GED                         | -                   | 29.08 (13.83-51.15) | 11.20 (6.87-17.75)  | 9.68 (4.78-18.61)   | 12.34 (7.06-20.67)  | 0.270  |
|                                                                                                                                                                                        | ≥HS diploma/GED                         | -                   | 70.92 (48.85-86.17) | 88.80 (82.25-93.13) | 90.32 (81.39-95.22) | 87.66 (79.33-92.94) |        |
| <b>Current school grade<sup>c</sup></b>                                                                                                                                                | ≤8 <sup>th</sup> grade                  | 12.59 (5.06-28.01)  | -                   | -                   | -                   | -                   | -      |
|                                                                                                                                                                                        | 9 <sup>th</sup> -12 <sup>th</sup> grade | 87.41 (71.99-94.94) | -                   | -                   | -                   | -                   |        |
| <b>Family income</b>                                                                                                                                                                   | \$0-19,999                              | 6.33 (1.34-25.24)   | 32.71 (20.95-47.14) | 29.22 (22.08-37.57) | 19.51 (13.11-28.02) | 25.69 (18.39-34.67) | <0.001 |
|                                                                                                                                                                                        | \$20,000-49,999                         | 19.80 (8.95-38.27)  | 35.50 (22.49-51.08) | 37.92 (29.61-47.00) | 32.58 (25.75-40.25) | 26.49 (19.55-34.84) |        |
|                                                                                                                                                                                        | \$50,000-74,999                         | 13.69 (4.24-36.22)  | 7.77 (3.96-14.67)   | 16.06 (9.95-24.89)  | 18.55 (12.05-27.46) | 12.12 (7.54-18.94)  |        |
|                                                                                                                                                                                        | ≥\$75,000                               | 60.17 (37.84-78.95) | 24.02 (13.48-39.07) | 16.80 (11.24-24.35) | 29.36 (22.19-37.71) | 35.69 (29.32-42.61) |        |
| <b>Ever military service<sup>b</sup></b>                                                                                                                                               |                                         | -                   | 0.00                | 2.34 (0.82-6.51)    | 3.41 (1.58-7.19)    | 20.70 (13.58-30.24) | 0.003  |
| <b>Overall health status</b>                                                                                                                                                           | Excellent/Very good/Good                | 94.74 (87.03-97.97) | 95.47 (85.14-98.72) | 90.73 (83.83-94.87) | 87.04 (79.69-92.00) | 75.74 (68.67-81.64) | <0.001 |
|                                                                                                                                                                                        | Fair/Poor                               | 5.26 (2.03-12.97)   | 4.53 (1.28-14.86)   | 9.27 (5.13-16.17)   | 12.96 (8.00-20.31)  | 24.26 (18.36-31.33) |        |
| <b>Has health insurance</b>                                                                                                                                                            |                                         | 92.88 (72.65-98.46) | 90.72 (78.06-96.41) | 84.28 (75.40-90.37) | 68.19 (56.20-78.17) | 86.33 (80.51-90.61) | 0.019  |
| <b>Past month SPD<sup>b,d</sup></b>                                                                                                                                                    |                                         | -                   | 17.70 (9.98-29.45)  | 26.84 (20.63-34.12) | 11.35 (7.22-17.40)  | 12.27 (8.35-17.68)  | 0.006  |
| <b>Past year illicit drug or alcohol dependence/abuse</b>                                                                                                                              |                                         | 61.14 (38.45-79.85) | 30.29 (18.96-44.66) | 43.49 (35.35-51.98) | 21.50 (16.57-27.41) | 20.53 (13.67-29.64) | <0.001 |
| <sup>a</sup> Among persons reporting past 30-day cigarette use<br><sup>b</sup> Among adults only<br><sup>c</sup> Among youth only<br><sup>d</sup> SPD = serious psychological distress |                                         |                     |                     |                     |                     |                     |        |
